# Supplementary material
Source: PubMed Central journal article supplement (PMC522024)
Supplement: pnas_101_41_14978__3.pdf [file pnas_101_41_14978__3.pdf]

**Table 1. Gene Ontology (GO) classes overrepresented ( $P < 0.01$ ) in the differentially regulated gene lists for treatments with compounds A and B**

| Overrepresented | GO class   | GO class annotation                              | No. genes*    | <i>P</i> value (A) | No. genes*    | <i>P</i> value (B) |
|-----------------|------------|--------------------------------------------------|---------------|--------------------|---------------|--------------------|
| A and B         | GO:0009408 | Response to heat                                 | 11 (10)       | 3.25E-14           | 3 (18)        | 7.52E-04           |
|                 | GO:0004364 | Glutathione transferase activity                 | 8 (38)        | 1.96E-07           | 7 (39)        | 1.29E-07           |
|                 | GO:0003700 | Transcription factor activity                    | 45<br>(1,432) | 4.52E-07           | 25<br>(1,452) | 9.75E-04           |
|                 | GO:0004009 | ATP-binding cassette (ABC) transporter activity  | 11 (110)      | 9.42E-07           | 7 (114)       | 8.85E-05           |
|                 | GO:0009877 | Nodulation                                       | 9 (80)        | 3.84E-06           | 5 (84)        | 1.05E-03           |
|                 | GO:0015706 | Nitrate transport                                | 9 (81)        | 4.22E-06           | 5 (85)        | 1.11E-03           |
|                 | GO:0006824 | Cobalt ion transport                             | 9(82)         | 4.62E-06           | 5 (86)        | 1.16E-03           |
|                 | GO:0008194 | UDP-glycosyltransferase activity                 | 9 (83)        | 5.06E-06           | 8 (84)        | 1.34E-06           |
|                 | GO:0019866 | Inner membrane                                   | 9 (86)        | 6.61E-06           | 5 (90)        | 1.41E-03           |
|                 | GO:0017004 | Cytochrome biogenesis                            | 9 (90)        | 9.28E-06           | 5 (94)        | 1.69E-03           |
|                 | GO:0015846 | Polyamine transport                              | 8 (79)        | 2.69E-05           | 5 (82)        | 9.50E-04           |
|                 | GO:0015833 | Peptide transport                                | 6 (44)        | 6.20E-05           | 5 (45)        | 7.05E-05           |
|                 | GO:0006865 | Amino acid transport                             | 9 (127)       | 1.15E-04           | 5 (131)       | 6.60E-03           |
|                 | GO:0009376 | HslUV protease complex                           | 2 (2)         | 1.11E-03           | 2 (2)         | 4.40E-04           |
|                 | GO:0006979 | Response to oxidative stress                     | 6 (90)        | 2.14E-03           | 5 (91)        | 1.48E-03           |
|                 | GO:0016651 | Oxidoreductase activity, acting on NADH or NADPH | 3 (17)        | 2.48E-03           | 3 (17)        | 6.48E-04           |
| A               | GO:0003773 | Heat shock protein activity                      | 14 (31)       | -5.68E-14          | 2 (43)        | 5.76E-02           |
|                 | GO:0016621 | Cinnamoyl-CoA reductase activity                 | 3 (7)         | 2.89E-04           | 1 (9)         | 8.31E-02           |
|                 | GO:0004219 | Pyroglutamyl-peptidase I activity                | 2 (1)         | 5.62E-04           | 0 (3)         | NA                 |
|                 | GO:0006810 | Transport                                        | 18 (574)      | 1.54E-03           | 11 (581)      | 1.41E-02           |
|                 | GO:0008270 | Zinc ion binding                                 | 16 (493)      | 1.98E-03           | 9 (500)       | 3.32E-02           |
|                 | GO:0006457 | Protein folding                                  | 9 (197)       | 2.30E-03           | 2 (204)       | 5.33E-01           |
|                 | GO:0009094 | L-phenylalanine biosynthesis                     | 2 (4)         | 2.73E-03           | 0 (6)         | NA                 |
|                 | GO:0004664 | Prephenate dehydratase activity                  | 2 (4)         | 2.73E-03           | 0 (6)         | NA                 |
|                 | GO:0006355 | Regulation of transcription, DNA-dependent       | 28<br>(1,146) | 3.47E-03           | 16<br>(1,158) | 4.82E-02           |

| <b>Overrepresented</b> | <b>GO class</b> | <b>GO class annotation</b>                         | <b>No. genes*</b> | <b>P value (A)</b> | <b>No. genes*</b> | <b>P value (B)</b> |
|------------------------|-----------------|----------------------------------------------------|-------------------|--------------------|-------------------|--------------------|
|                        | GO:0016758      | Transferase activity, transferring hexosyl groups  | 5 (69)            | 3.56E-03           | 3 (71)            | 2.63E-02           |
|                        | GO:0016563      | Transcriptional activator activity                 | 3 (22)            | 4.75E-03           | 2 (23)            | 1.95E-02           |
|                        | GO:0009723      | Response to ethylene stimulus                      | 2 (7)             | 6.38E-03           | 0 (9)             | NA                 |
|                        | GO:0005515      | Protein binding                                    | 15 (512)          | 6.70E-03           | 6 (521)           | 3.04E-01           |
|                        | GO:0005829      | Cytosol                                            | 3 (26)            | 7.25E-03           | 1 (28)            | 2.22E-01           |
| <b>B</b>               | GO:0016757      | Transferase activity, transferring glycosyl groups | 10 (302)          | 1.17E-02           | 9 (303)           | 1.62E-03           |
|                        | GO:0016021      | Integral to membrane                               | 14 (622)          | 5.83E-02           | 13 (623)          | 3.66E-03           |
|                        | GO:0007275      | Development                                        | 5 (117)           | 2.70E-02           | 5 (117)           | 4.18E-03           |
|                        | GO:0004564      | Beta-fructofuranosidase activity                   | 0 (13)            | NA                 | 2 (11)            | 5.43E-03           |
|                        | GO:0006400      | tRNA modification                                  | 2 (11)            | 1.33E-02           | 2 (11)            | 5.43E-03           |
|                        | GO:0004788      | Thiamin diphosphokinase activity                   | 1 (0)             | 1.38E-02           | 1 (0)             | 8.63E-03           |
|                        | GO:0006772      | Thiamin metabolism                                 | 1 (0)             | 1.38E-02           | 1 (0)             | 8.63E-03           |
|                        | GO:0008559      | Xenobiotic-transporting ATPase activity            | 1 (0)             | 1.38E-02           | 1 (0)             | 8.63E-03           |

NA, not available.

\* Number of differentially regulated genes within this GO class (number of genes within this class that are not differentially regulated).
