# Supplementary material
Source: PubMed Central journal article supplement (PMC522024)

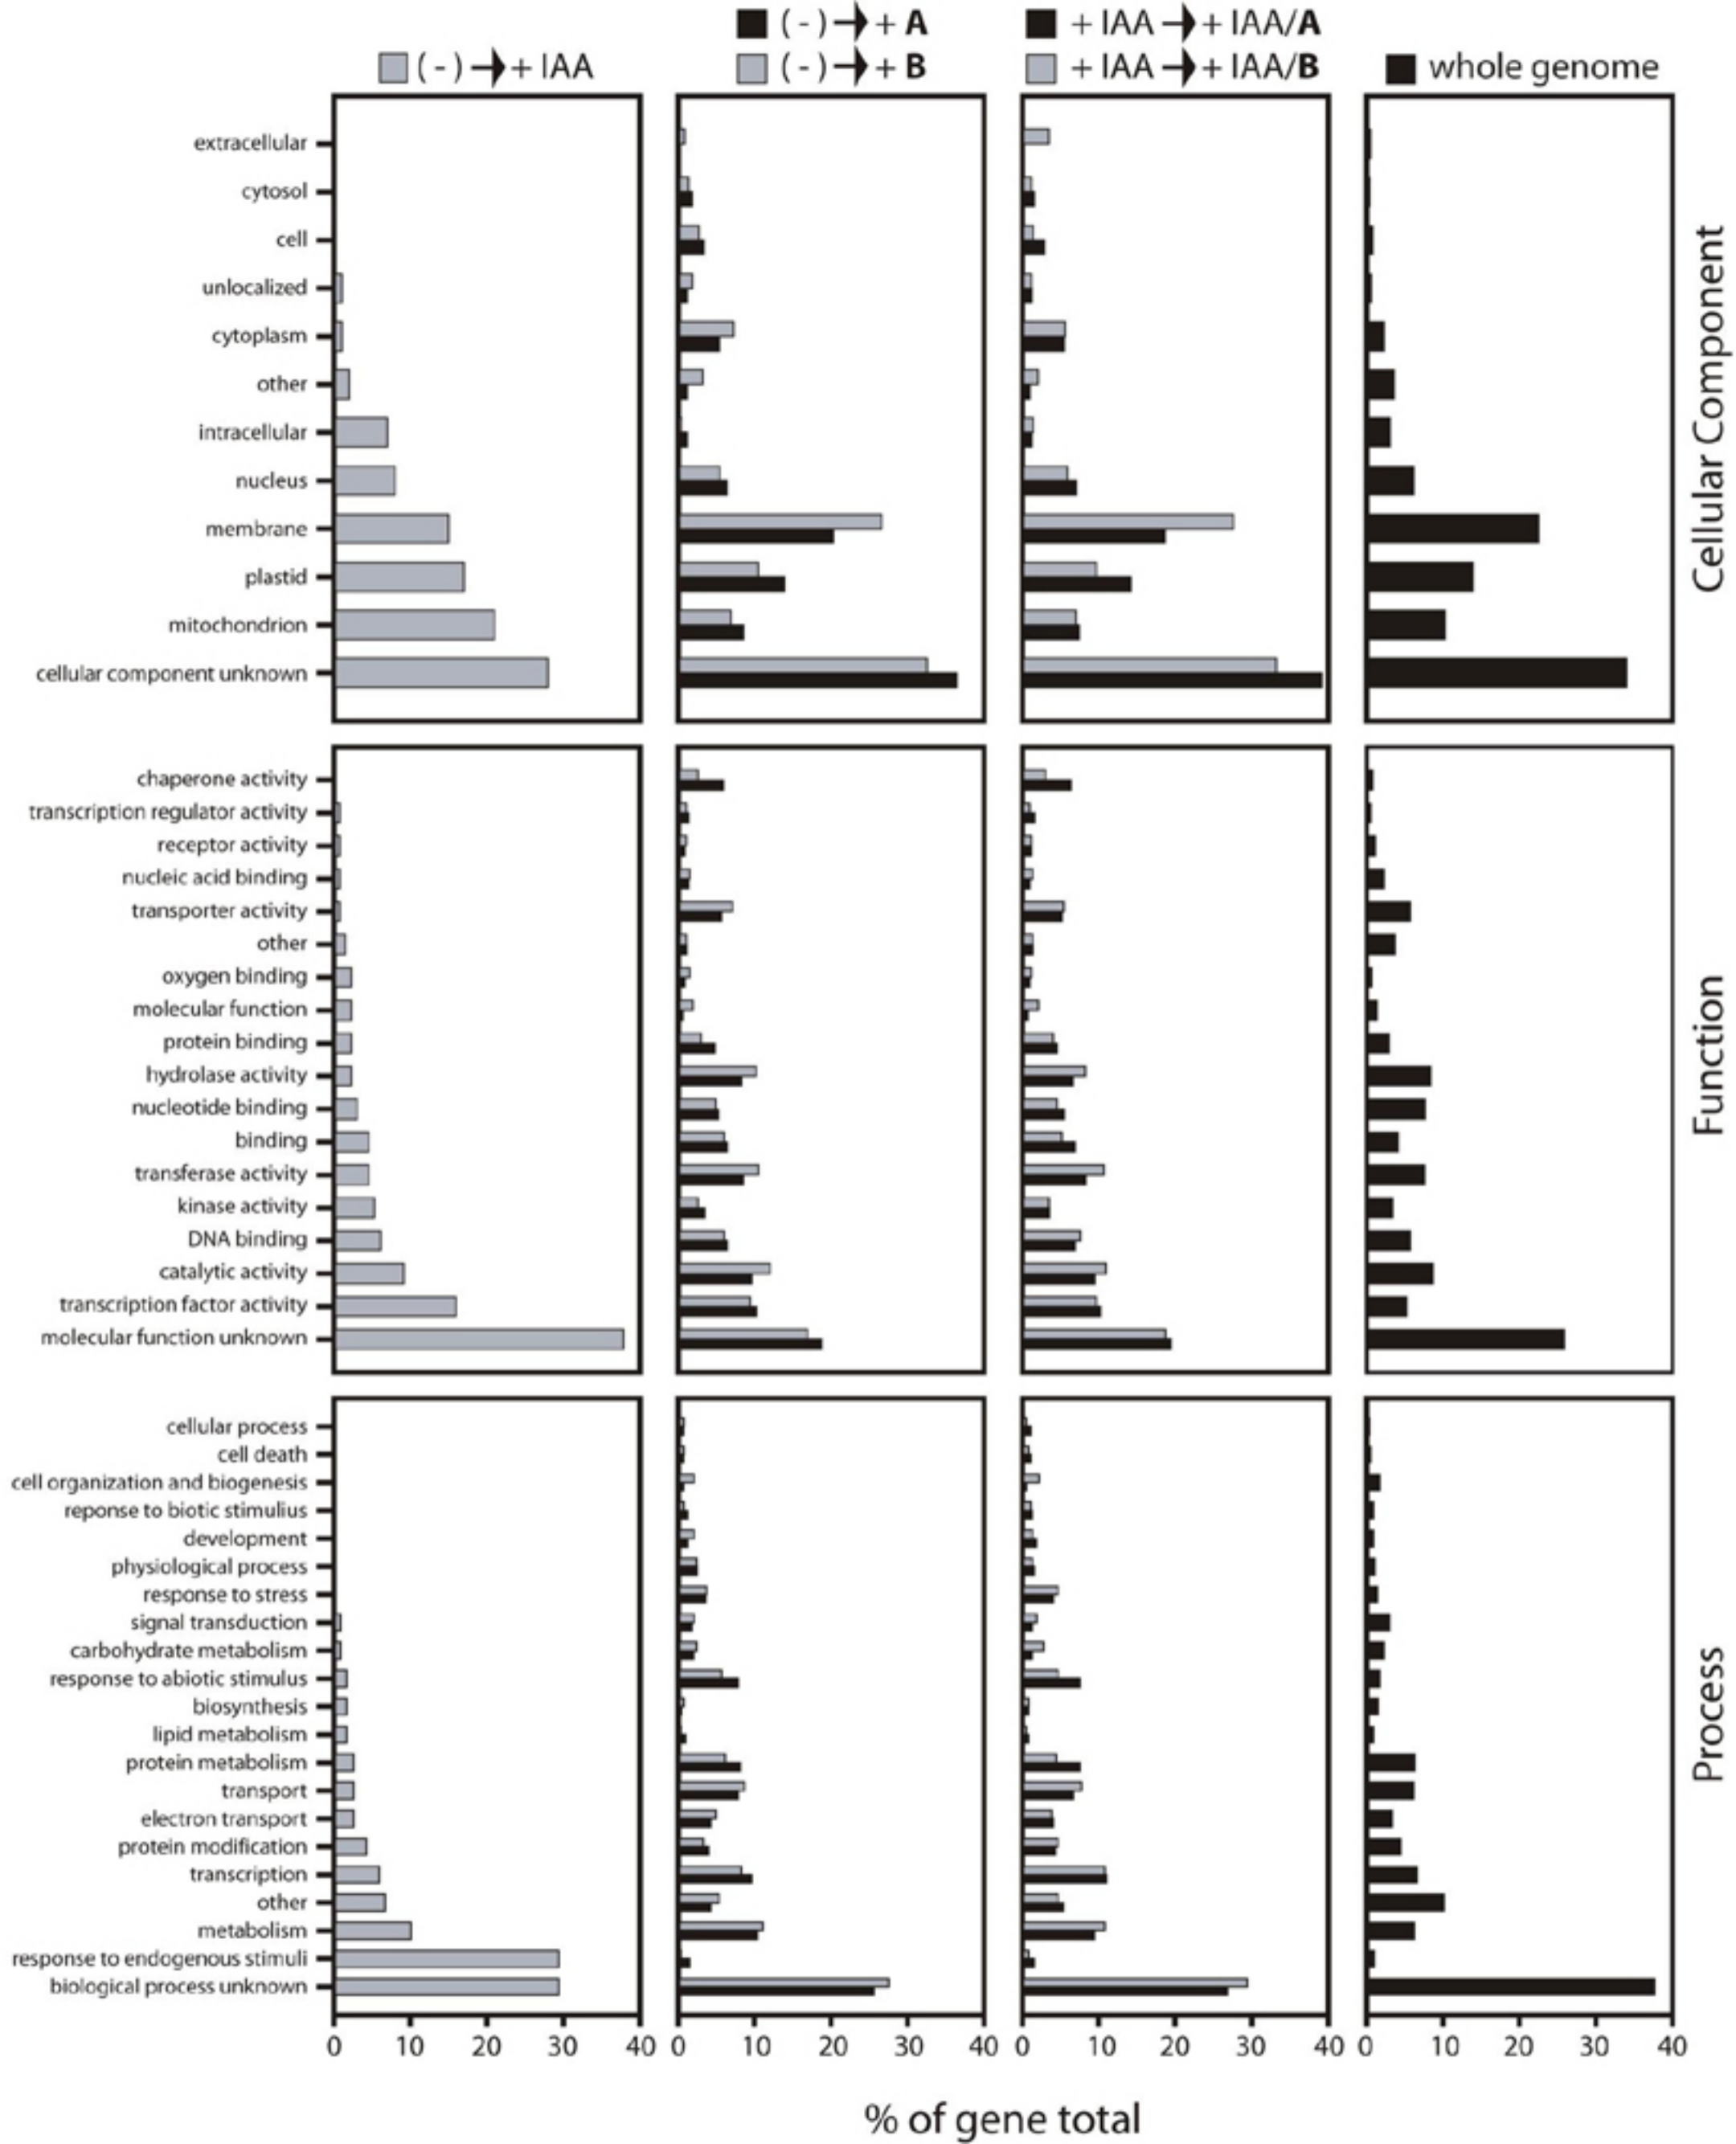

Supplement: pnas_101_41_14978__2.pdf [file pnas_101_41_14978__2.pdf]
